# Supplementary material
Source: publisher figshare collection journal article supplement (https://rs.figshare.com/ndownloader/files/13261970)
Supplement: Supplementary file 1 [file 13261970]

Population,Site,Institution,Individual.ID,inlet.ML,inlet.AP,midplane.ML,midplane.AP,outlet.ML,outlet.AP,Region,Body.mass
Ainu,,"Kyoto University, Japan",626,12.35,11.3,9.8,11.7,12.3,11.2,Asia,51.6032466
Ainu,,"Kyoto University, Japan",630,14.3,11.1,11.5,12.9,12.7,12.55,Asia,61.6234262
Ainu,,"Kyoto University, Japan",658,12.1,10,9.4,12.3,11,11.9,Asia,52.0271444
Ainu,,"Tokyo University, Japan",1335,11.9,8.4,8.9,11.9,10.8,11.1,Asia,NA
Ainu,,"Tokyo University, Japan",1346,12.1,11.5,10.1,12.85,11.6,12.4,Asia,NA
Ainu,,"Tokyo University, Japan",1349,13.1,11.8,10.2,12.9,11,12.1,Asia,NA
Ainu,,"Tokyo University, Japan",1354,13.6,11.4,10.3,12.7,11.6,12.1,Asia,NA
Ainu,,"Tokyo University, Japan",1364,13,11.2,9.8,13.55,11.4,12.75,Asia,NA
Ainu,,"Tokyo University, Japan",1432,12.15,9.8,10.3,12.75,11.2,12.1,Asia,NA
Ainu,,"Tokyo University, Japan",1437,13.1,9.6,10,11.1,12.3,10.8,Asia,NA
Ainu,,"Tokyo University, Japan",1438,11.8,10.75,9.1,12.9,9.2,12.2,Asia,NA
Ainu,,"Tokyo University, Japan",1452,12.7,12,11.3,13.3,12.2,13,Asia,NA
Ainu,,"Tokyo University, Japan",1454,12.45,10.7,9.8,12.8,12.3,12.2,Asia,NA
Alaska,,"American Museum of Natural History, New York, USA",99.1/102,12.4,9.5,9.7,10.7,10.8,9.9,Americas,52.5887581
Alaska,,"American Museum of Natural History, New York, USA",99.1/168,13.5,11.1,10.4,12.3,13.2,12,Americas,46.67302075
Alaska,,"American Museum of Natural History, New York, USA",99.1/198,12.9,11,10.7,12.2,12.3,11.7,Americas,52.17777205
Alaska,,"American Museum of Natural History, New York, USA",99.1/200,13.85,9.7,12.1,13.3,14,12.9,Americas,48.25833619
Alaska,,"American Museum of Natural History, New York, USA",99.1/257,11.8,9.8,11.5,12.7,12.6,12.7,Americas,53.19637916
Alaska,,"American Museum of Natural History, New York, USA",99.1/268,12.6,10.5,10.7,10.9,13.1,10.7,Americas,50.66511623
Alaska,,"American Museum of Natural History, New York, USA",99.1/276,13.5,11.2,11.2,12,14.2,11.2,Americas,54.94655912
Alaska,,"American Museum of Natural History, New York, USA",99.1/316,11.8,10.3,10.2,12.3,13,11.8,Americas,52.23395086
Alaska,,"American Museum of Natural History, New York, USA",99.1/334,13.5,11,10.3,12.9,13.2,12.3,Americas,51.66475041
Alaska,,"American Museum of Natural History, New York, USA",99.1/338,13.8,9.9,10.7,12.8,12.2,12.5,Americas,58.22440657
Alaska,,"American Museum of Natural History, New York, USA",99.1/359,12.7,9.6,10.4,11.6,13.3,11,Americas,50.06666668
Alaska,,"American Museum of Natural History, New York, USA",99.1/362,12.8,9.6,9.8,10.9,12,10.2,Americas,47.35056761
Alaska,,"American Museum of Natural History, New York, USA",99.1/377,14.1,10.6,11.2,11.9,14,11.1,Americas,59.32062622
Alaska,,"American Museum of Natural History, New York, USA",99.1/412,11.7,10.7,10.5,12.4,12.8,12.3,Americas,55.83223811
Alaska,,"American Museum of Natural History, New York, USA",99.1/424,13,10.2,9.5,12.6,11.9,11.9,Americas,55.06567458
Alaska,,"American Museum of Natural History, New York, USA",99.1/459,13.2,11.6,10.3,13.4,12.6,12.4,Americas,54.42219074
Alaska,,"American Museum of Natural History, New York, USA",99.1/465,13.8,10.8,11.6,13.9,12.9,13.5,Americas,57.40136377
Alaska,,"American Museum of Natural History, New York, USA",99.1/485,14.1,11.4,11.9,12.2,14.6,11.3,Americas,52.62386703
Alaska,,"American Museum of Natural History, New York, USA",99.1/500,12.9,8.8,10.7,11.9,12.1,12,Americas,57.37756431
Alaska,,"American Museum of Natural History, New York, USA",99.1/526,12.9,9.6,10.1,11.4,12.6,10.6,Americas,55.13300683
Alaska,,"American Museum of Natural History, New York, USA",99.1/99,12.9,10.5,11.1,13.4,13.6,13.1,Americas,44.85834017
Arikara,Larson site,"University of Tennessee at Knoxville, USA",B113D,13.65,11.6,11.3,13.1,14,12.5,Americas,61.74594477
Arikara,Larson site,"University of Tennessee at Knoxville, USA",B117,12.4,10.4,10.2,12.6,11.9,11.9,Americas,NA
Arikara,Larson site,"University of Tennessee at Knoxville, USA",B129B,13.5,11.5,11.1,13.4,13.3,12.8,Americas,57.51081221
Arikara,Larson site,"University of Tennessee at Knoxville, USA",B132,13.8,10.95,11.1,12,14.2,11.5,Americas,48.68082952
Arikara,Larson site,"University of Tennessee at Knoxville, USA",B135,12.6,10.3,8.8,10.7,11.1,10.3,Americas,53.77485715
Arikara,Larson site,"University of Tennessee at Knoxville, USA",B142,13.9,12.1,10.8,13,11.8,12.2,Americas,64.82768006
Arikara,Larson site,"University of Tennessee at Knoxville, USA",B33A,13.6,10.75,10.1,12.75,11.9,12.3,Americas,59.46082695
Arikara,Larson site,"University of Tennessee at Knoxville, USA",B33B,13.5,9.5,9.9,13.1,12,12.5,Americas,50.50029607
Arikara,Larson site,"University of Tennessee at Knoxville, USA",B36,14.2,10,11.1,12.6,12.8,12,Americas,53.66192312
Arikara,Larson site,"University of Tennessee at Knoxville, USA",B3A,13.15,10.8,9.6,12.3,12.2,11.8,Americas,54.72808184
Arikara,Larson site,"University of Tennessee at Knoxville, USA",B3C/G,13.1,10.3,11.2,12.7,14.2,12,Americas,55.61948787
Arikara,Larson site,"University of Tennessee at Knoxville, USA",B4B,13.7,10.6,10.1,12.2,11.6,11.4,Americas,49.24975303
Arikara,Larson site,"University of Tennessee at Knoxville, USA",B6,13,11.3,9.7,12.4,12.1,11.5,Americas,55.29025661
Arikara,Larson site,"University of Tennessee at Knoxville, USA",B60B,13.5,10.15,10.6,12.7,13.2,12,Americas,54.84083329
Arikara,Larson site,"University of Tennessee at Knoxville, USA",B6B,12.6,11.3,10.1,10.9,12.1,10.5,Americas,44.07138985
Arikara,Larson site,"University of Tennessee at Knoxville, USA",B76B,13.5,10.8,10.9,11.5,12.9,10.9,Americas,56.10508813
Austria,,"Cleveland Museum of Natural History, Ohio, USA",412,11.3,10.9,9,10.8,11.9,10.2,Europe and North Africa,49.31480877
Austria,,"Cleveland Museum of Natural History, Ohio, USA",466,13.5,8.8,10.5,11,13.2,10.4,Europe and North Africa,48.54422503
Austria,,"Naturhistorisches Museum, Wien, Austria",667,13.4,10,10.9,11.5,13.5,10.8,Europe and North Africa,54.15309053
Austria,,"Cleveland Museum of Natural History, Ohio, USA",681,13.1,10.2,9.1,12.4,10.5,11.8,Europe and North Africa,56.05020315
Austria,,"Naturhistorisches Museum, Wien, Austria",694,13.9,11.2,10.2,12.6,12.7,12,Europe and North Africa,52.96584619
Austria,,"Cleveland Museum of Natural History, Ohio, USA",1157,12.5,11.3,10.1,13.5,12.6,12.5,Europe and North Africa,52.56599882
Austria,,"Cleveland Museum of Natural History, Ohio, USA",1309,12.5,10.25,9.7,12.4,12.5,11.7,Europe and North Africa,43.92610262
Austria,,"Cleveland Museum of Natural History, Ohio, USA",1755,13.6,10.35,10.2,13.2,12.5,13,Europe and North Africa,60.7275688
Austria,,"Cleveland Museum of Natural History, Ohio, USA",1771,11.75,11.1,8.8,11.8,11.1,11.2,Europe and North Africa,47.12015457
Austria,,"Cleveland Museum of Natural History, Ohio, USA",2056,14.4,11.6,11.8,13.1,13.8,11.9,Europe and North Africa,59.20093546
Austria,,"Naturhistorisches Museum, Wien, Austria",25955,12.1,11.25,10.7,11.8,13.2,11.2,Europe and North Africa,49.8771644
Austria,,"Naturhistorisches Museum, Wien, Austria",25975,13.7,10.7,11.5,12.6,14.7,12.2,Europe and North Africa,55.12537965
Austria,,"Naturhistorisches Museum, Wien, Austria",25978,12.4,9,11.3,12.3,13.6,12.8,Europe and North Africa,43.91273869
Botswana,,"University of Witwatersrand, Johannesburgh, South Africa",931,11.2,10.4,9.4,12.3,11.5,11.65,Subsaharan Africa,44.85106251
Botswana,,"University of Witwatersrand, Johannesburgh, South Africa",1519,11.6,10.6,10.6,13.4,12.6,12.8,Subsaharan Africa,44.27750744
Botswana,,"University of Witwatersrand, Johannesburgh, South Africa",2129,12,10.85,8.9,12.6,9.3,12.35,Subsaharan Africa,47.18447007
Botswana,,"University of Witwatersrand, Johannesburgh, South Africa",2371,11.5,11.1,9.6,12.7,12,11.65,Subsaharan Africa,48.77026215
Botswana,,"University of Witwatersrand, Johannesburgh, South Africa",2965,11.5,11.8,9.7,12.8,11.1,10.5,Subsaharan Africa,53.51368317
Botswana,,"University of Witwatersrand, Johannesburgh, South Africa",3095,12.3,10.3,9.4,11.4,11.25,11.2,Subsaharan Africa,44.64390246
Botswana,,"University of Witwatersrand, Johannesburgh, South Africa",3127,11.5,10.9,9.4,11.1,10.2,10.4,Subsaharan Africa,56.70541421
Botswana,,"University of Witwatersrand, Johannesburgh, South Africa",3183,11.3,11.3,9.3,12.9,11.1,11.6,Subsaharan Africa,52.98222378
Botswana,,"University of Witwatersrand, Johannesburgh, South Africa",3188,9.5,10.5,7.5,11.9,10.1,9.9,Subsaharan Africa,44.75078379
Botswana,,"University of Witwatersrand, Johannesburgh, South Africa",3195,11.9,10.1,9.7,10.9,11,12.2,Subsaharan Africa,47.91406851
Botswana,,"University of Witwatersrand, Johannesburgh, South Africa",3376,12.4,10.2,11.3,12.2,13,12.4,Subsaharan Africa,53.90917988
Botswana,,"University of Witwatersrand, Johannesburgh, South Africa",3419,11.75,10.5,9.9,12,10.6,11.2,Subsaharan Africa,40.08741603
Botswana,,"University of Witwatersrand, Johannesburgh, South Africa",3499,13.8,12.3,10.4,12.75,10.7,11.5,Subsaharan Africa,58.96229731
Botswana,,"University of Witwatersrand, Johannesburgh, South Africa",3501,11.25,8.7,9.9,9.9,11.5,9.4,Subsaharan Africa,44.33710307
Botswana,,"University of Witwatersrand, Johannesburgh, South Africa",3524,10.9,10.2,9.9,11.9,10.6,12.8,Subsaharan Africa,42.28485543
Botswana,,"University of Witwatersrand, Johannesburgh, South Africa",3532,11.7,11.5,9.2,13.4,10.7,11.7,Subsaharan Africa,46.40231251
Botswana,,"University of Witwatersrand, Johannesburgh, South Africa",3557,11.5,9.6,10,11.7,11.6,11.9,Subsaharan Africa,52.03286798
Botswana,,"University of Witwatersrand, Johannesburgh, South Africa",3787,12.6,11.5,9.5,12.6,10.4,11.9,Subsaharan Africa,43.38600349
California,Ala-329,"University of California at Berkeley, USA",5328,14.5,11.25,11.1,12.4,13.9,12,Americas,49.88993432
California,Cco-138,"University of California at Berkeley, USA",6107,13.4,10,10.2,12,12.5,11.9,Americas,47.93346995
California,Cco-138,"University of California at Berkeley, USA",6117,13.6,11.1,11.2,12.8,14.1,11.9,Americas,43.64531943
California,Cco-138,"University of California at Berkeley, USA",6118,13.4,12.25,11,13.2,14.3,13,Americas,42.67957214
California,Cco-138,"University of California at Berkeley, USA",6259,13.6,10.2,11.1,12.9,12.5,12.5,Americas,47.20276445
California,Ala-329,"University of California at Berkeley, USA",7072,13.1,10.75,9.7,12.5,11.9,12.2,Americas,46.04818989
California,Ala-329,"University of California at Berkeley, USA",7077,14.1,11.5,11.7,14.6,14.8,14.1,Americas,49.64565239
California,Ala-329,"University of California at Berkeley, USA",7101,12.7,10.6,9.9,12.3,12.6,12.2,Americas,40.26543659
California,Ala-329,"University of California at Berkeley, USA",7102,14.2,10.8,10.2,12.4,13.2,11.95,Americas,43.28638716
California,Cco-138,"University of California at Berkeley, USA",9729,12.5,10.1,9.8,13.1,12.8,12.6,Americas,48.91755788
California,Cco-138,"University of California at Berkeley, USA",9959,13.1,10.7,10.9,12.1,14.1,11.9,Americas,45.93737381
California,Cco-138,"University of California at Berkeley, USA",9960,13.7,11.7,10.6,13.9,12.6,13.4,Americas,54.72086214
California,Cco-138,"University of California at Berkeley, USA",9963,13.1,9.9,10.8,12,13.6,11.4,Americas,41.29709553
California,Cco-138,"University of California at Berkeley, USA",10519,14.15,11.4,12.3,13.3,13.2,13.2,Americas,54.43624319
California,Cco-138,"University of California at Berkeley, USA",10534,14.7,10.8,11.2,13.35,13.7,12.7,Americas,57.63248094
Egypt,El Gizeh,"Naturhistorisches Museum, Wien, Austria",5302,13,10.25,10.5,12.3,13.5,11.5,Europe and North Africa,51.39404089
Egypt,El Hesa,"American Museum of Natural History, New York, USA",VL3102,12.8,12.3,10,13.4,12.6,12.4,Europe and North Africa,51.99917091
Egypt,El Hesa,"American Museum of Natural History, New York, USA",VL3105,12.75,12.1,11,12.4,13.9,12,Europe and North Africa,49.44745443
Egypt,El Hesa,"American Museum of Natural History, New York, USA",VL3111,12.4,11.3,10.2,12.5,10.2,11.6,Europe and North Africa,47.83929152
Egypt,El Hesa,"American Museum of Natural History, New York, USA",VL3139,12.7,10,11.9,12,14.6,11.8,Europe and North Africa,32.54989451
Egypt,El Hesa,"American Museum of Natural History, New York, USA",VL3146,12.2,10.6,10.4,10.9,11.7,10.35,Europe and North Africa,48.30558492
Egypt,El Hesa,"American Museum of Natural History, New York, USA",VL3167,12.25,10.9,10.2,12.6,10.9,12,Europe and North Africa,35.82977271
Egypt,El Hesa,"American Museum of Natural History, New York, USA",VL3175,13.4,11.6,10.7,11.4,13.65,11.6,Europe and North Africa,46.77364384
Egypt,El Hesa,"American Museum of Natural History, New York, USA",VL3178,12.55,9.55,10.1,11.7,12.1,12,Europe and North Africa,44.04287011
France,,"Musée de l’Homme, Paris, France",35048,12.8,11.7,9.1,14.2,12,13.7,Europe and North Africa,60.1397969
France,,"Musée de l’Homme, Paris, France",35053,12.2,11.5,10.6,12.7,13,13.2,Europe and North Africa,50.21979408
France,,"Musée de l’Homme, Paris, France",35054,13.2,10.5,12.5,12.5,14.5,11.8,Europe and North Africa,58.92807516
France,,"Musée de l’Homme, Paris, France",35055,12.3,9.5,11,12,13.9,11.1,Europe and North Africa,47.67362333
France,,"Musée de l’Homme, Paris, France",35060,12.4,10.7,9.5,12.5,11.4,12.7,Europe and North Africa,53.38582714
France,,"Musée de l’Homme, Paris, France",35061,12.45,11,9.4,12.3,12.7,11.4,Europe and North Africa,51.25296769
France,,"Musée de l’Homme, Paris, France",35063,13.7,10.8,11.3,12.9,12.9,12.2,Europe and North Africa,59.07339817
France,,"Musée de l’Homme, Paris, France",35065,13,12.3,9.7,13.35,12.1,12.4,Europe and North Africa,55.90031241
France,,"Musée de l’Homme, Paris, France",35067,13.65,10.3,10.4,13.3,12.6,12.6,Europe and North Africa,50.75192623
France,,"Musée de l’Homme, Paris, France",35068,13.9,11.6,10,13,11.65,12.8,Europe and North Africa,51.79210493
France,,"Musée de l’Homme, Paris, France",35070,12.8,11.15,10.6,12.5,12.2,11.85,Europe and North Africa,58.41914173
France,,"Musée de l’Homme, Paris, France",35071,12.7,11.1,10.4,13.1,12.1,12.5,Europe and North Africa,47.9911917
France,,"Musée de l’Homme, Paris, France",35075,12,10.5,10.2,11.55,13.2,10.65,Europe and North Africa,52.18725057
France,,"Musée de l’Homme, Paris, France",35076,12.25,10.4,10.2,12.6,12,11.9,Europe and North Africa,48.64480568
France,,"Musée de l’Homme, Paris, France",35077,14,8.8,10.1,11.8,12.2,11.5,Europe and North Africa,55.31951214
Fuegian,,"University of Rome “La Sapienza”, Italy",2,12.3,11,9.5,12.5,11.7,12.1,Americas,42.49601034
Fuegian,,"University of Rome “La Sapienza”, Italy",3,12.5,10.4,10.2,14.5,11.7,13.8,Americas,47.80474419
Fuegian,,"University of Rome “La Sapienza”, Italy",4,13,10.2,11.4,14.6,13.1,15,Americas,54.70896767
Fuegian,,"University of Rome “La Sapienza”, Italy",7,13.2,11.5,10.2,13.9,10.8,13.7,Americas,53.78650535
Fuegian,,"University of Rome “La Sapienza”, Italy",9,13.3,10.6,10.9,12.1,12.5,11.6,Americas,43.58207997
Fuegian,,"University of Rome “La Sapienza”, Italy",10,13.4,10.15,10.6,12.7,12.5,12.2,Americas,40.26707398
Fuegian,,"University of Rome “La Sapienza”, Italy",11,13.9,12.2,11.4,15.1,13.2,14.2,Americas,54.42785361
Fuegian,,"Museo Nazionale di Antropologia e Etnologia, Firenze, Italy",3119,12.6,10.3,10.85,12.6,13.2,12.2,Americas,44.98912976
Fuegian,,"Museo Nazionale di Antropologia e Etnologia, Firenze, Italy",3128,13.1,10.5,11.5,13.4,13.8,12.7,Americas,47.89850503
India,,"San Diego Museum of Man, California, USA",5,11.1,10.9,8.8,12.1,10,11.6,Asia,NA
India,,"San Diego Museum of Man, California, USA",9,12.45,11,8.9,11.8,11.1,11.2,Asia,NA
India,,"San Diego Museum of Man, California, USA",12,10.6,10.1,8.25,11.2,10.2,10.8,Asia,NA
India,,"San Diego Museum of Man, California, USA",14,11.9,11,9.1,11.4,12.5,10.35,Asia,NA
India,,"San Diego Museum of Man, California, USA",15,12.3,12.4,9.3,13.1,10.9,12.8,Asia,NA
India,,"San Diego Museum of Man, California, USA",1986/20/4,12,10.15,8.5,11.3,9.5,10.5,Asia,43.1981772
India,,"San Diego Museum of Man, California, USA",2004/32/55,11.05,10.5,8.5,11.6,11,10.6,Asia,45.14877723
India,,"San Diego Museum of Man, California, USA",2004/32/60,12.7,9.85,8.8,11.1,11.65,10.7,Asia,50.72245131
India,,"San Diego Museum of Man, California, USA",2004/32/61,12.05,10.5,9,11.7,10.9,11.2,Asia,47.30613519
India,,"San Diego Museum of Man, California, USA",2008/5/83,11.6,10.3,8.8,11.1,11.65,10.7,Asia,46.99087122
India,,"San Diego Museum of Man, California, USA",Lab1,11.5,9.75,8.9,11.2,11.5,10.15,Asia,43.33044579
Iran,,"University of Pennsylvania at Philadelphia, USA",33-16-112,11.9,10.2,9.9,12.1,11.2,11.4,Asia,55.40160741
Iran,,"University of Pennsylvania at Philadelphia, USA",33-16-162,14.2,11.5,10.4,13.6,12.4,12.9,Asia,66.62143519
Iran,,"University of Pennsylvania at Philadelphia, USA",33-16-171,12.9,10.5,9.7,13.7,10.2,13.1,Asia,50.84244995
Iran,,"University of Pennsylvania at Philadelphia, USA",33-16-178,13.3,10.8,10.8,13.3,13,12.7,Asia,55.74920065
Iran,,"University of Pennsylvania at Philadelphia, USA",33-16-179,12,9.3,10.2,10.8,13,10.2,Asia,46.68237671
Iran,,"University of Pennsylvania at Philadelphia, USA",33-23-181,13.3,10,11.2,13.2,13.9,13.2,Asia,56.85682274
Iran,,"University of Pennsylvania at Philadelphia, USA",63-3-306,13.35,11,11.2,12.5,12.4,11.7,Asia,56.47108329
Iran,,"University of Pennsylvania at Philadelphia, USA",65-31-768,13,10.3,10.1,12,12.4,11.7,Asia,45.18645572
Iran,,"University of Pennsylvania at Philadelphia, USA",65-31-774,11.8,9.7,8.6,11.9,9.5,11.2,Asia,43.87413124
Iran,,"University of Pennsylvania at Philadelphia, USA",65-31-795,12.6,9.2,10.1,11.8,11.2,11.7,Asia,35.78217719
Iran,,"University of Pennsylvania at Philadelphia, USA",66-23-370,13.2,11,10.6,12.55,12.4,12.1,Asia,52.44192257
Italy,,"Museo Nazionale di Antropologia e Etnologia, Firenze, Italy",4853,12.2,9.4,10.1,11.8,12.1,11.4,Europe and North Africa,40.96276832
Italy,,"Museo Nazionale di Antropologia e Etnologia, Firenze, Italy",4868,13.2,12.2,11.4,11.9,14,11.1,Europe and North Africa,51.23488051
Italy,,"Museo Nazionale di Antropologia e Etnologia, Firenze, Italy",4874,13.3,11.2,9,13.2,11.55,12.5,Europe and North Africa,56.0498439
Italy,,"Museo Nazionale di Antropologia e Etnologia, Firenze, Italy",4884,13.4,13,10.4,13.7,13.4,13.7,Europe and North Africa,58.31050336
Italy,,"Museo Nazionale di Antropologia e Etnologia, Firenze, Italy",4887,13.3,12.2,9.8,14.1,10.6,12.9,Europe and North Africa,58.22442763
Italy,,"Museo Nazionale di Antropologia e Etnologia, Firenze, Italy",4896,14.1,11.8,10.6,11.9,12.3,11,Europe and North Africa,62.55999755
Japan,,"Kyoto University, Japan",1089,12.1,9.85,8.7,10.5,10.9,9.9,Asia,51.19118347
Japan,,"Kyoto University, Japan",1443,12.7,11,9.1,11.5,11.65,10.5,Asia,60.76194638
Japan,,"Kyoto University, Japan",2403,11,11.3,8.4,11.8,10.6,11.15,Asia,49.55162355
Japan,,"Kyoto University, Japan",2404,12,10.9,9.1,12.95,11.2,12.6,Asia,44.03790914
Japan,,"Kyoto University, Japan",2405,11.8,11.55,8.5,13.8,10.4,13.2,Asia,52.17527555
Japan,,"Kyoto University, Japan",2538,12.6,10.5,10.4,12.5,12,12.4,Asia,50.44509847
Japan,,"Kyoto University, Japan",2548,13,11.7,9.2,13,11.25,11.9,Asia,47.89490674
Japan,,"Kyoto University, Japan",2600,12.1,10,8.4,11,10.4,10.7,Asia,45.87957314
Japan,,"Kyoto University, Japan",2677,10.9,8.9,8.85,10.7,11.5,10.3,Asia,49.5105808
Japan,,"Kyoto University, Japan",2941,12.1,11.4,8.7,13.6,9.7,12.7,Asia,41.76977058
Japan,,"Kyoto University, Japan",2944,11.9,11.75,8.8,12.5,10.9,11.8,Asia,47.11760281
Japan,,"Kyoto University, Japan",3000,12.4,10.6,9.5,12.1,12.3,11.55,Asia,58.24634152
Japan,,"Kyoto University, Japan",3002,11.7,11.1,9.5,11.6,11.2,11.4,Asia,42.41547316
Japan,,"Musée de l’Homme, Paris, France",10145,11.35,10.4,9.35,12.3,10.4,11.6,Asia,42.48245062
Japan,,"Musée de l’Homme, Paris, France",10149,12.1,12.5,9.8,12.8,12.3,12.4,Asia,47.17085484
Japan,,"Musée de l’Homme, Paris, France",10268,11,8.5,8.6,11.3,11.2,10.6,Asia,36.62932435
Japan,,"Musée de l’Homme, Paris, France",25009,11.4,10.3,10.3,12.4,11.85,12.1,Asia,52.60194273
Japan,,"Musée de l’Homme, Paris, France",24975-10,11.85,11,8.9,11.9,11.2,11.4,Asia,59.66647151
Japan,,"Musée de l’Homme, Paris, France",24975-4,11.8,11.1,9.5,12.3,11.2,12.3,Asia,52.93726907
Japan,,"Musée de l’Homme, Paris, France",24975-8,11.9,10.5,8.8,11.6,9.3,10.7,Asia,47.13593842
Japan,,"Musée de l’Homme, Paris, France",25012-5,12.4,10.35,10.2,12.1,12.6,11.8,Asia,53.26615585
Kenya,,"National Museum of Kenya, Nairobi, Kenya",1940,12.1,11.1,8.4,12,10.1,11.5,Subsaharan Africa,48.02169516
Kenya,,"National Museum of Kenya, Nairobi, Kenya",5478,11.2,10.45,9.1,10.9,11.15,10.4,Subsaharan Africa,46.1653903
Kenya,,"National Museum of Kenya, Nairobi, Kenya",5517,11.75,10.2,9.2,11.7,11.4,11.2,Subsaharan Africa,50.83075804
Kenya,,"National Museum of Kenya, Nairobi, Kenya",5521,11.4,10.5,9.6,10.85,11.5,10.4,Subsaharan Africa,50.11937955
Kenya,,"National Museum of Kenya, Nairobi, Kenya",5888,13.3,10.5,9.75,12.4,10.5,11.5,Subsaharan Africa,45.63035076
Kenya,,"National Museum of Kenya, Nairobi, Kenya",5900,11.4,9.5,10.25,10.7,12.25,10.3,Subsaharan Africa,45.94460631
Kenya,,"National Museum of Kenya, Nairobi, Kenya",5910,12,9,9.9,10.9,10.2,10.6,Subsaharan Africa,39.17051026
Kenya,,"National Museum of Kenya, Nairobi, Kenya",5914,12.5,11.55,9.2,11.3,10.8,11.1,Subsaharan Africa,48.52578376
Kenya,,"National Museum of Kenya, Nairobi, Kenya",5976,12.4,9.9,9.5,11.4,10.2,11.1,Subsaharan Africa,41.72940573
Kenya,,"National Museum of Kenya, Nairobi, Kenya",5991,12.4,11.2,8.9,12.6,9.5,11.7,Subsaharan Africa,46.89744518
Kenya,,"National Museum of Kenya, Nairobi, Kenya",6020,12.5,9.5,9.8,11.9,10.7,11.5,Subsaharan Africa,56.48173518
Kenya,,"National Museum of Kenya, Nairobi, Kenya",6031,11.1,9,9.2,10.8,9.3,10.6,Subsaharan Africa,36.97327979
Kenya,,"National Museum of Kenya, Nairobi, Kenya",6036,12.2,11.3,9.4,13.3,11.1,12.9,Subsaharan Africa,46.82461732
Kenya,,"National Museum of Kenya, Nairobi, Kenya",6057,11.6,11.7,9.6,13.4,11.1,13,Subsaharan Africa,47.22084868
Kenya,,"National Museum of Kenya, Nairobi, Kenya",6069,11.35,11.6,8.5,12.8,9.7,11.6,Subsaharan Africa,46.40009515
Kenya,,"National Museum of Kenya, Nairobi, Kenya",6072,11.1,9.35,9.1,11.8,10.8,12.3,Subsaharan Africa,49.60375696
Kenya,,"National Museum of Kenya, Nairobi, Kenya",6111,11,8.9,9.2,11.8,10.5,11.2,Subsaharan Africa,40.66349184
Kenya,,"National Museum of Kenya, Nairobi, Kenya",6166,12,11.3,9.5,13.1,10.5,12.1,Subsaharan Africa,50.98136991
Kenya,,"National Museum of Kenya, Nairobi, Kenya",6176,9.9,10.5,7.3,10.6,8.3,9.9,Subsaharan Africa,54.85661068
Kenya,,"National Museum of Kenya, Nairobi, Kenya",6179,11.5,9.7,8.3,12.7,9.9,12.8,Subsaharan Africa,49.31939059
Kenya,,"National Museum of Kenya, Nairobi, Kenya",6215,11.65,10.2,9.4,12.1,10.95,11.3,Subsaharan Africa,38.92313813
KhoeSan,,"McGregor Museum, Kimberley, South Africa",147,11.25,10.6,10.3,12.3,11.2,11.8,Subsaharan Africa,42.51301634
KhoeSan,,"McGregor Museum, Kimberley, South Africa",155,11.1,10,9.6,12.8,9.7,12.1,Subsaharan Africa,41.40027496
KhoeSan,,"McGregor Museum, Kimberley, South Africa",165,9.7,11.2,8.7,12.6,9.6,12.5,Subsaharan Africa,50.39048548
KhoeSan,,"University of Witwatersrand, Johannesburgh, South Africa",178,11.75,10.1,9.8,12,11.65,11.4,Subsaharan Africa,44.04034116
KhoeSan,,"McGregor Museum, Kimberley, South Africa",204,11,10.8,9,13.2,9.4,12.7,Subsaharan Africa,42.31797063
KhoeSan,,"McGregor Museum, Kimberley, South Africa",228,11.5,10.8,9.8,10.6,11.7,10.2,Subsaharan Africa,41.94259679
KhoeSan,,"McGregor Museum, Kimberley, South Africa",235,10.2,10.3,9.3,12,10.6,11.4,Subsaharan Africa,40.88141739
KhoeSan,,"McGregor Museum, Kimberley, South Africa",236,11.75,9.8,9.9,12.35,11.5,11.9,Subsaharan Africa,40.92138954
KhoeSan,,"McGregor Museum, Kimberley, South Africa",250,11.55,10.1,11,11.7,12.1,11.3,Subsaharan Africa,45.32861044
KhoeSan,,"McGregor Museum, Kimberley, South Africa",281,10.3,11.2,10,13.4,11.5,12.8,Subsaharan Africa,44.70122263
KhoeSan,,"University of Witwatersrand, Johannesburgh, South Africa",320,11,9.4,10.1,12.6,11.5,12.1,Subsaharan Africa,42.25054029
KhoeSan,,"Natural History Museum, London, UK",1921-12-17-1,10.65,8.9,9.8,11.3,10.1,11.1,Subsaharan Africa,36.50749157
Lesotho,,"University of Witwatersrand, Johannesburgh, South Africa",682,12.3,9.25,8.8,12.8,9.5,12.4,Subsaharan Africa,47.40177934
Lesotho,,"University of Witwatersrand, Johannesburgh, South Africa",822,12,10.8,9.5,12.7,10.6,12.3,Subsaharan Africa,47.6964448
Lesotho,,"University of Witwatersrand, Johannesburgh, South Africa",828,12.4,11,9.7,11.8,12.2,11.4,Subsaharan Africa,52.44132896
Lesotho,,"University of Witwatersrand, Johannesburgh, South Africa",831,10.9,11,8.4,13.7,8.9,13.1,Subsaharan Africa,52.15943386
Lesotho,,"University of Witwatersrand, Johannesburgh, South Africa",866,10.9,11.1,9.65,13.7,11.3,13.3,Subsaharan Africa,56.26283579
Lesotho,,"University of Witwatersrand, Johannesburgh, South Africa",886,11.4,10.4,9.7,12.4,11.7,11.7,Subsaharan Africa,46.20504936
Lesotho,,"University of Witwatersrand, Johannesburgh, South Africa",887,12.2,10.8,10.8,11.5,12.4,11.65,Subsaharan Africa,45.00984566
Lesotho,,"University of Witwatersrand, Johannesburgh, South Africa",892,12.15,11.7,10.9,13.8,12,13.2,Subsaharan Africa,47.0630748
Lesotho,,"University of Witwatersrand, Johannesburgh, South Africa",903,11,10.5,8.8,12.25,11.2,11.4,Subsaharan Africa,41.68980059
Lesotho,,"University of Witwatersrand, Johannesburgh, South Africa",953,12.4,11.7,8.9,13.1,11,12.1,Subsaharan Africa,51.83620503
Lesotho,,"University of Witwatersrand, Johannesburgh, South Africa",983,11,11,9.3,11.9,10.6,11.2,Subsaharan Africa,43.31643454
Lesotho,,"University of Witwatersrand, Johannesburgh, South Africa",1285,11,9.9,9.4,11.9,11.5,11.3,Subsaharan Africa,48.61206808
Lesotho,,"University of Witwatersrand, Johannesburgh, South Africa",1297,12,10.6,9.4,11,10.6,11,Subsaharan Africa,56.38390622
Lesotho,,"University of Witwatersrand, Johannesburgh, South Africa",1344,11.8,11.1,9.5,12.5,10.4,11.9,Subsaharan Africa,44.56042438
Lesotho,,"University of Witwatersrand, Johannesburgh, South Africa",1389,12.1,11.8,9.8,13.2,11.6,12.7,Subsaharan Africa,48.14996999
Lesotho,,"University of Witwatersrand, Johannesburgh, South Africa",1416,11.9,10.4,10.7,10.8,11.4,10.5,Subsaharan Africa,47.43598933
Lesotho,,"University of Witwatersrand, Johannesburgh, South Africa",1536,11.7,10.6,9.3,12.3,11.3,11.9,Subsaharan Africa,43.10887051
Lesotho,,"University of Witwatersrand, Johannesburgh, South Africa",1668,12.2,10.9,9.3,11.7,10.4,11.2,Subsaharan Africa,51.52621907
Lesotho,,"University of Witwatersrand, Johannesburgh, South Africa",1692,11.3,8.4,8.4,11.7,10.4,11.35,Subsaharan Africa,38.06773253
Lesotho,,"University of Witwatersrand, Johannesburgh, South Africa",1891,11.2,11.9,10.1,13.4,12.35,12.9,Subsaharan Africa,49.42681841
Lesotho,,"University of Witwatersrand, Johannesburgh, South Africa",1895,11.9,10.6,10,12.8,12.2,12,Subsaharan Africa,44.8675313
Nubia,,"Naturhistorisches Museum, Wien, Austria",C1/35,12.6,11.4,10.5,12.3,12.65,11.4,Europe and North Africa,48.78543457
Nubia,,"Naturhistorisches Museum, Wien, Austria",C1/38,12,10.6,7.9,12.9,11.3,12.2,Europe and North Africa,50.56312688
Nubia,,"Naturhistorisches Museum, Wien, Austria",C1/62,11.65,10.5,8.2,11.2,9.8,11.3,Europe and North Africa,48.71600159
Nubia,,"Naturhistorisches Museum, Wien, Austria",C1/66,12.55,11.8,11,11.95,14.2,11,Europe and North Africa,49.52777777
Nubia,,"Naturhistorisches Museum, Wien, Austria",C2/110,13.8,10.9,10.8,12.7,13.6,13,Europe and North Africa,61.53689762
Nubia,,"Naturhistorisches Museum, Wien, Austria",C2/118/2,12.2,10.75,9.8,11.9,13.2,11.2,Europe and North Africa,53.09595034
Nubia,,"Naturhistorisches Museum, Wien, Austria",C2/125,11.3,11.3,8.2,12.8,10.4,12.3,Europe and North Africa,44.97507784
Nubia,,"Naturhistorisches Museum, Wien, Austria",C2/25,12.7,11.9,9.8,12.4,12.4,11.4,Europe and North Africa,46.73266318
Nubia,,"Naturhistorisches Museum, Wien, Austria",C2/49,11.9,10.2,8.4,12.3,10.5,11.6,Europe and North Africa,NA
Nubia,,"Naturhistorisches Museum, Wien, Austria",C2/61/2,11.6,11.1,9.4,11.9,11.85,11.3,Europe and North Africa,42.04571176
Nubia,,"Naturhistorisches Museum, Wien, Austria",C2/61/3,12.9,11.4,10.1,12.4,12.4,11.9,Europe and North Africa,51.5720489
Nubia,,"Naturhistorisches Museum, Wien, Austria",C2/66/2,12.1,10.1,10.7,12,12.7,11.5,Europe and North Africa,42.49570249
Nubia,,"Naturhistorisches Museum, Wien, Austria",C2/68/1,11.75,10,9.5,11.7,11.9,11.3,Europe and North Africa,43.99251053
Nubia,,"Naturhistorisches Museum, Wien, Austria",C2/75,12.6,11,10.2,11.3,13.1,11,Europe and North Africa,45.74790988
Nubia,,"Naturhistorisches Museum, Wien, Austria",c2/88/2,12.4,10.7,9.4,12.15,10.9,11.6,Europe and North Africa,49.86545862
Nubia,,"Naturhistorisches Museum, Wien, Austria",C2/90/2,12.9,10.8,9.1,11.8,11.8,11.5,Europe and North Africa,44.29981014
Nubia,,"Naturhistorisches Museum, Wien, Austria",C2/99,13.4,10.3,10.1,12.4,12.4,12.2,Europe and North Africa,55.01134342
Patagonia,,"Museo Nazionale di Antropologia e Etnologia, Firenze, Italy",3801,12.6,10,9.5,11.7,11.9,10.9,Americas,44.24175941
Patagonia,,"Museo Nazionale di Antropologia e Etnologia, Firenze, Italy",4458,12.15,11.8,8.6,11.7,11.7,11,Americas,50.09781032
Patagonia,,"Musée de l’Homme, Paris, France",12262,14.1,11.7,12.2,13.4,14.8,13.1,Americas,58.82085623
Patagonia,,"Musée de l’Homme, Paris, France",12263,13.55,11.1,10.9,13.1,12.7,12.2,Americas,51.8875125
Patagonia,,"Musée de l’Homme, Paris, France",12272,14.4,11.9,9.9,13.4,12.9,12.5,Americas,60.41156341
Patagonia,,"Musée de l’Homme, Paris, France",12275,12.5,10.9,8.7,11.9,11.7,12,Americas,62.22703251
Patagonia,,"Musée de l’Homme, Paris, France",12280,14,11.9,10.2,13.55,13.7,12.6,Americas,58.09666369
Peru,Ancon,"Musée de l’Homme, Paris, France",10570,12.8,10.4,10.5,12.9,13.1,12.65,Americas,48.29231495
Peru,Ancon,"Musée de l’Homme, Paris, France",10572,12.45,11.5,9.1,11.2,11.9,10.8,Americas,44.75039296
Peru,Ancon,"Musée de l’Homme, Paris, France",10576,12.85,10.7,10.2,12.5,13.3,12.4,Americas,47.59663615
Peru,Ancon,"Musée de l’Homme, Paris, France",10578,13.3,10.7,10.7,12.2,13.2,11.6,Americas,52.13668266
Peru,Ancon,"Musée de l’Homme, Paris, France",10579,12.4,10.4,10.2,12.4,12.8,12.1,Americas,46.89651148
Peru,Ancon,"Musée de l’Homme, Paris, France",10582,12.4,9,9.8,12.2,12.8,11.5,Americas,39.25976394
Peru,Ancon,"Musée de l’Homme, Paris, France",10586,12.15,10.8,8.9,12,11.9,11.3,Americas,46.35744726
Peru,Ancon,"Musée de l’Homme, Paris, France",10587,11.7,8.4,9.8,10.9,12.8,11,Americas,44.54275442
Peru,Ancon,"Musée de l’Homme, Paris, France",18021,13.2,10.6,11.1,11,13.4,10.3,Americas,51.8211293
Peru,Ancon,"Musée de l’Homme, Paris, France",19849,13.15,9.3,10,11.9,12.4,11.5,Americas,48.61048004
Peru,Ancon,"Musée de l’Homme, Paris, France",19850,12.25,9.8,9.7,12.9,12.4,13,Americas,46.52849624
Peru,Ancon,"Musée de l’Homme, Paris, France",19851,12.3,11.2,10.3,12.2,12.4,12,Americas,58.511551
Peru,Ancon,"Musée de l’Homme, Paris, France",19856,13.1,10.7,9.8,12.6,12,12.1,Americas,45.09889656
Philippines negritos,,"Musée de l’Homme, Paris, France",8280,11.1,9.8,9,10.8,11.8,10.1,Asia,39.53068731
Philippines negritos,,"Musée de l’Homme, Paris, France",9758,11.35,10.9,9.35,12.9,11.2,12.7,Asia,37.52093265
Philippines negritos,,"Musée de l’Homme, Paris, France",9759,12,9.9,9.6,11.3,11.7,11.2,Asia,43.35210158
Philippines negritos,,"Musée de l’Homme, Paris, France",9764,10.4,9,8.5,11.3,10.6,10.9,Asia,34.44706432
Philippines negritos,,"Musée de l’Homme, Paris, France",9767,11.7,10.25,8.8,12,10.9,11.5,Asia,43.79520946
Philippines negritos,,"Musée de l’Homme, Paris, France",9768,11.3,9.2,8.6,11.6,11.3,11.3,Asia,33.89180254
Philippines negritos,,"Musée de l’Homme, Paris, France",9866,11.7,10.1,8.7,12.7,11,12.2,Asia,44.36202997
Philippines negritos,,"Musée de l’Homme, Paris, France",9867,10.85,9.4,8.4,11.5,10.6,11,Asia,36.92834445
Portugal,,"Coimbra University, Portugal",2,14.8,11.3,11.1,11.6,13.2,11.2,Europe and North Africa,60.77724615
Portugal,,"Coimbra University, Portugal",7,14.3,11.2,11,12.7,13,11.8,Europe and North Africa,45.20568033
Portugal,,"Coimbra University, Portugal",9,12.2,11.1,9.8,11.6,12.3,11,Europe and North Africa,49.72768511
Portugal,,"Coimbra University, Portugal",17,13.9,10.2,10.2,10.6,11.9,10,Europe and North Africa,54.3136679
Portugal,,"Coimbra University, Portugal",30,12.6,12.05,9.1,12.3,11.8,11.5,Europe and North Africa,48.78108899
Portugal,,"Coimbra University, Portugal",52,14.6,9.9,10.3,12.2,12.1,11.2,Europe and North Africa,46.98377655
Portugal,,"Coimbra University, Portugal",81,13.4,11,10.5,13.2,11.2,12.7,Europe and North Africa,54.02087851
Portugal,,"Coimbra University, Portugal",99,11.5,10.8,9.35,11.3,11.5,10.8,Europe and North Africa,46.96589118
Portugal,,"Coimbra University, Portugal",131,11.5,10,9.4,10.6,11.8,10.5,Europe and North Africa,35.5390853
Portugal,,"Coimbra University, Portugal",142,13.9,11.9,10.8,13,13.3,12.7,Europe and North Africa,53.36412029
Portugal,,"Coimbra University, Portugal",144,12.7,11.5,9.7,12.2,11.4,11.2,Europe and North Africa,51.57842269
Portugal,,"Coimbra University, Portugal",148,13.4,10.9,10.8,13.3,13.3,12.6,Europe and North Africa,50.38407164
Portugal,,"Coimbra University, Portugal",153,12.2,12,9.1,13.2,11.3,12.5,Europe and North Africa,54.62914583
Portugal,,"Coimbra University, Portugal",155,13,11.6,9.6,13.5,10.9,12.8,Europe and North Africa,52.86457087
Portugal,,"Coimbra University, Portugal",172,11.8,11.3,9.7,12.2,12.3,11.2,Europe and North Africa,46.55296054
Portugal,,"Coimbra University, Portugal",182,13.1,10.3,10.4,11.8,12.5,11.4,Europe and North Africa,53.43309445
Portugal,,"Coimbra University, Portugal",201,15,12.6,11.5,13,13.8,12.1,Europe and North Africa,53.06354744
Portugal,,"Coimbra University, Portugal",225,11.2,8.8,9.4,9.8,11,9,Europe and North Africa,38.2892461
Portugal,,"Coimbra University, Portugal",252,12.3,10.95,10.6,12.8,13.1,12.6,Europe and North Africa,40.23689773
Portugal,,"Coimbra University, Portugal",254,12.8,10.5,10.4,12.3,12.5,11.7,Europe and North Africa,50.87169424
Portugal,,"Coimbra University, Portugal",283,12.15,11.5,9.1,13.3,11.9,12.4,Europe and North Africa,54.21686663
Portugal,,"Coimbra University, Portugal",293,11.9,10.55,10.1,11.95,11.2,11.5,Europe and North Africa,47.16063332
Portugal,,"Coimbra University, Portugal",300,11.9,10.55,8.4,12,11.7,11.6,Europe and North Africa,47.46022878
Portugal,,"Coimbra University, Portugal",317,12.5,12.7,9,12.8,10.9,12,Europe and North Africa,52.92419267
Portugal,,"Coimbra University, Portugal",449,13.4,10.2,9.9,12.1,12.4,11.2,Europe and North Africa,42.51647299
Sadlermiut,,"Musée Canadien des Civilisations, Gatineau, Canada",NP-138,13.5,9.8,11.2,12.6,13.5,10.95,Americas,58.46195701
Sadlermiut,,"Musée Canadien des Civilisations, Gatineau, Canada",NP-159,13.5,11.5,11.4,13.8,12.8,12.9,Americas,58.39371583
Sadlermiut,,"Musée Canadien des Civilisations, Gatineau, Canada",NP-166,13.7,10.9,11.2,13.9,12.8,13.3,Americas,60.52610275
Sadlermiut,,"Musée Canadien des Civilisations, Gatineau, Canada",NP-B19,13.2,11.3,10.8,12.7,12.15,12.2,Americas,56.40873215
Sadlermiut,,"Musée Canadien des Civilisations, Gatineau, Canada",NP-B44,13.3,9.9,10.5,12.3,11.6,11.8,Americas,56.79397705
Sadlermiut,,"Musée Canadien des Civilisations, Gatineau, Canada",NP-B49,11.9,10.2,10.8,13.3,12.5,12.8,Americas,56.42275326
Sadlermiut,,"Musée Canadien des Civilisations, Gatineau, Canada",NP-B4A,13.6,8.5,11.7,11.7,12.4,10.95,Americas,58.47128204
Sadlermiut,,"Musée Canadien des Civilisations, Gatineau, Canada",NP-B9B,14.8,10.2,11.3,15.3,14.2,15.4,Americas,55.01465278
Sadlermiut,,"Musée Canadien des Civilisations, Gatineau, Canada",PP-B3,12.55,10.1,10.8,13.3,12.6,12.9,Americas,55.18071357
Swaziland,,"University of Witwatersrand, Johannesburgh, South Africa",757,11.4,10.2,10.2,12.1,10.6,11.6,Subsaharan Africa,40.77924284
Swaziland,,"University of Witwatersrand, Johannesburgh, South Africa",759,12.1,11.65,10.6,12.2,12,11.7,Subsaharan Africa,54.49076
Swaziland,,"University of Witwatersrand, Johannesburgh, South Africa",891,12.3,11.5,10.4,12.6,12,12,Subsaharan Africa,41.58261944
Swaziland,,"University of Witwatersrand, Johannesburgh, South Africa",897,11.9,10.1,10.6,13.7,11.7,13.2,Subsaharan Africa,46.00365374
Swaziland,,"University of Witwatersrand, Johannesburgh, South Africa",900,10.8,10.8,10.1,11.5,11.5,10.7,Subsaharan Africa,45.70682614
Swaziland,,"University of Witwatersrand, Johannesburgh, South Africa",950,12.1,9.55,10.2,11.3,11.7,10.9,Subsaharan Africa,46.71507134
Swaziland,,"University of Witwatersrand, Johannesburgh, South Africa",1438,11.8,10.4,10.2,13,11.3,12.1,Subsaharan Africa,47.41429968
Swaziland,,"University of Witwatersrand, Johannesburgh, South Africa",1534,12,10.8,10,11.4,11.7,10.8,Subsaharan Africa,46.42799432
Swaziland,,"University of Witwatersrand, Johannesburgh, South Africa",1631,12.7,11.3,10.6,13.5,12,13,Subsaharan Africa,55.87923207
Swaziland,,"University of Witwatersrand, Johannesburgh, South Africa",2068,12.6,10.6,10.2,12.1,11.2,11.4,Subsaharan Africa,51.35625596
Swaziland,,"University of Witwatersrand, Johannesburgh, South Africa",2394,12.9,11.2,9.7,14,10.1,13.9,Subsaharan Africa,50.46993469
Swaziland,,"University of Witwatersrand, Johannesburgh, South Africa",2464,11.1,10,7.3,11.2,9.1,10.2,Subsaharan Africa,41.84042779
Swaziland,,"University of Witwatersrand, Johannesburgh, South Africa",2741,10.7,10.1,8.3,10.8,10.1,10.3,Subsaharan Africa,51.5984408
Swaziland,,"University of Witwatersrand, Johannesburgh, South Africa",3291,11,10.5,9.4,11.4,10.6,11.2,Subsaharan Africa,50.26044734
Swaziland,,"University of Witwatersrand, Johannesburgh, South Africa",3413,11.8,9.1,8.6,11.3,9.9,10.9,Subsaharan Africa,53.46991948
Swaziland,,"University of Witwatersrand, Johannesburgh, South Africa",3605,11.5,11,9.7,12.2,11.7,11,Subsaharan Africa,41.11764693
Thailand,,"Musée de l’Homme, Paris, France",20005,12.1,10.8,9,12.1,11.2,11.8,Asia,NA
Thailand,,"Chiang Mai University, Thailand",114-50,12.9,12.2,10.9,10.6,13,9.7,Asia,51.70588427
Thailand,,"Chiang Mai University, Thailand",122-51,11.9,11.4,9.5,11.4,10.7,11,Asia,37.88591974
Thailand,,"Chiang Mai University, Thailand",131-50,12.7,12.2,9.5,10.8,10.3,10.3,Asia,59.83719851
Thailand,,"Chiang Mai University, Thailand",136-50,13.2,12.2,11.2,12.1,14.1,11.5,Asia,51.7156842
Thailand,,"Chiang Mai University, Thailand",142-52,11.65,11.55,9.5,11.1,10.2,10.2,Asia,49.7852211
Thailand,,"Chiang Mai University, Thailand",147-52,12.35,11.1,9.3,11.8,11.5,11.1,Asia,46.44555114
Thailand,,"Chiang Mai University, Thailand",153-52,13.9,13.4,10.2,12.2,12.2,11.3,Asia,52.09115341
Thailand,,"Chiang Mai University, Thailand",160-50,11.9,13.3,8.6,13.3,10.6,12.8,Asia,47.18565925
Thailand,,"Chiang Mai University, Thailand",160-52,13,11,11.1,12.3,12.2,11.4,Asia,49.90766104
Thailand,,"Chiang Mai University, Thailand",163-52,12.2,10.9,9,12.1,10.7,11.7,Asia,47.3465305
Thailand,,"Chiang Mai University, Thailand",184-52,12.8,12.3,10,12.4,10.7,11.7,Asia,59.97855951
Thailand,,"Chiang Mai University, Thailand",188-51,12.6,11.9,11.1,12.2,12.25,11.7,Asia,44.01435787
Thailand,,"Chiang Mai University, Thailand",22-52,13,11.6,10,12.6,11.6,12.1,Asia,45.72751559
Thailand,,"Chiang Mai University, Thailand",23-50,12.7,13.1,9.2,11.65,11.3,10.6,Asia,57.04192364
Thailand,,"Chiang Mai University, Thailand",25-52,12,11.8,9,11.6,11.9,11,Asia,43.35543077
Thailand,,"Chiang Mai University, Thailand",28-51,11.5,13.4,9.6,11.2,13.3,10.4,Asia,45.04569804
Thailand,,"Chiang Mai University, Thailand",35-53,12.75,10.8,10.7,11.6,12.75,11.1,Asia,43.43278673
Thailand,,"Chiang Mai University, Thailand",38-52,11.2,10.9,9.5,11.2,10.9,10.6,Asia,45.99057195
Thailand,,"Chiang Mai University, Thailand",40-51,13.4,10.7,9.7,12.2,10.9,11.5,Asia,53.66120152
Thailand,,"Chiang Mai University, Thailand",53-52,12.6,10.4,10.1,12.4,11,12,Asia,46.16691358
